# Supplementary material for: Meta-analysis identifies candidate key genes in endometrium as predictive biomarkers for clinical pregnancy in IVF
Source: PubMed Central journal article supplement (PMC5731968; doi:10.18632/oncotarget.22096), 2017-10-26
Supplement: oncotarget-08-102428-s001.pdf [file oncotarget-08-102428-s001.pdf]

## **Meta-analysis identifies candidate key genes in endometrium as predictive biomarkers for clinical pregnancy in IVF**

### **SUPPLEMENTARY MATERIALS**

**Supplementary Table 1: The detail results of DEGs.** See [Supplementary\\_Table\\_1](#)

**Supplementary Table 2: The degree results of these genes in network.** See [Supplementary\\_Table\\_2](#)

**Supplementary Table 3: The KEGG enrichment analysis of these genes in network.** See [Supplementary\\_Table\\_3](#)
